# Supplementary material for: Labelling of endogenous target protein via N–S acyl transfer-mediated activation of N-sulfanylethylanilide
Source: Royal Society of Chemistry journal article supplement (doi:10.1039/c6ob01014h), 2016-01-01

Electronic Supplementary Information

**Labelling of Endogenous Target Protein via N-S Acyl Transfer-Mediated Activation of *N*-Sulfanylethylanilide**

Masaya Denda<sup>a</sup>, Takuya Morisaki<sup>a</sup>, Taiki Kohiki<sup>a</sup>, Jun Yamamoto<sup>a</sup>, Kohei Sato<sup>a,b</sup>, Ikuko Sagawa<sup>c</sup>, Tsubasa Inokuma<sup>a</sup>, Youichi Sato<sup>a</sup>, Aiko Yamauchi<sup>a</sup>, Akira Shigenaga<sup>\*a,d</sup> and Akira Otaka<sup>\*a</sup>

- a) Institute of Biomedical Sciences and Graduate School of Pharmaceutical Sciences, Tokushima University, Shomachi, Tokushima 770-8505, Japan
- b) Current address: Department of Applied Chemistry and Biochemical Engineering, and Green Energy Research Division, Research Institute of Green Science and Technology, Shizuoka University, 3-5-1 Johoku, Hamamatsu, Shizuoka 432-8561, Japan
- c) Institute for Medicinal Research, Graduate School of Pharmaceutical Sciences, Tokushima University, Shomachi, Tokushima 770-8505, Japan
- d) JST, PRESTO, 4-1-8 Honcho, Kawaguchi, Saitama 332-0012, Japan

E-mail:

shigenaga.akira@tokushima-u.ac.jp (A. Shigenaga)

aotaka@ph.tokushima-u.ac.jp (A. Otaka)

## Table of Contents

|                                                       |    |
|-------------------------------------------------------|----|
| Supplemental Figures S1-S2.....                       | S2 |
| Copies of $^1\text{H}/^{13}\text{C}$ NMR spectra..... | S4 |

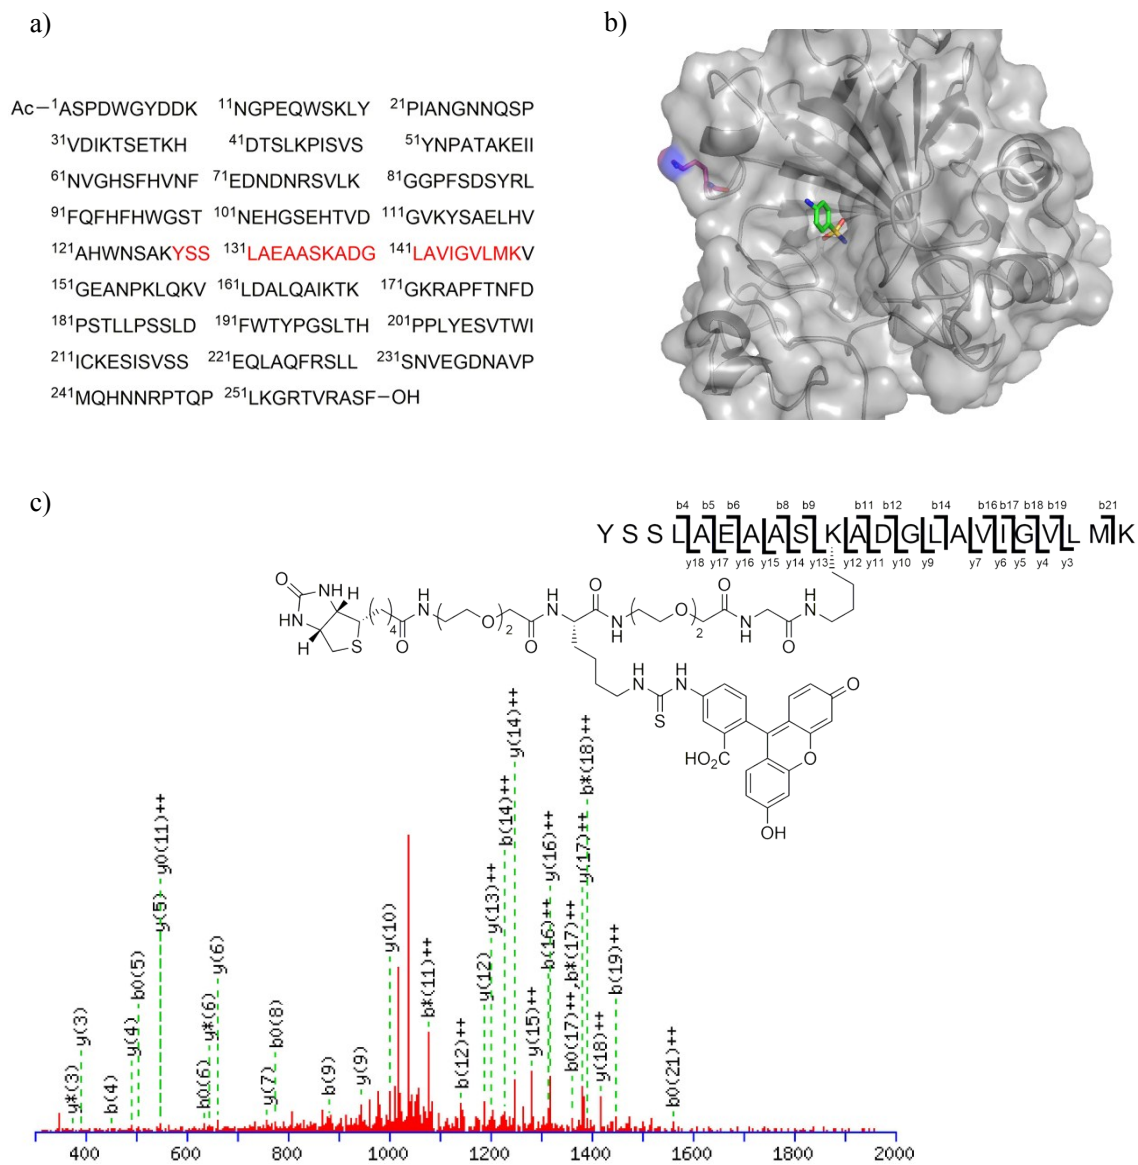

**Fig. S1.** Mass spectral analysis of the labelling site of hCA1 using SEAL 4. (a) The primary sequence of hCA1. (b) Crystal structure of hCA1 complexed with 3-Actoxymercuri-4-aminobenzenesulfonamide (PDB ID: 1CZM). The amino acid (Lys 137) modified by 4 is highlighted by a colored stick model. (c) nanoLC-MS/MS analysis of the fragment labelled at Lys137.

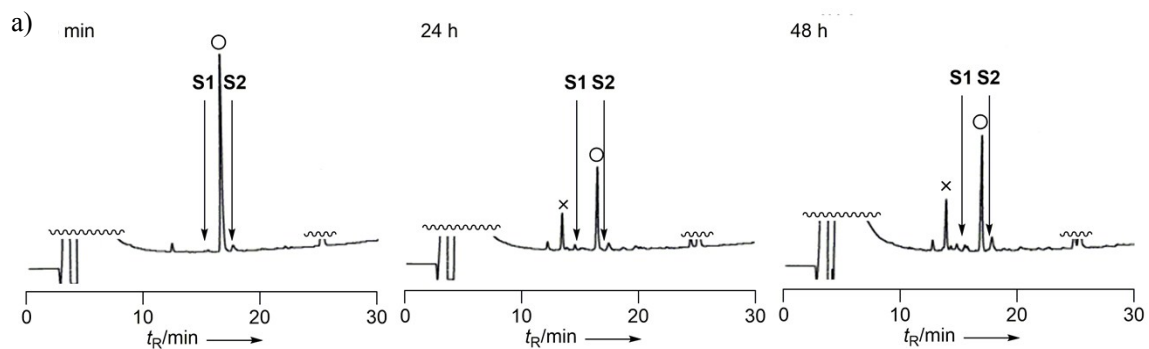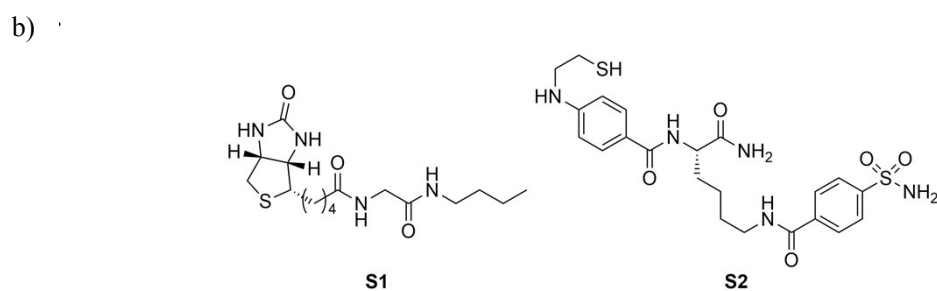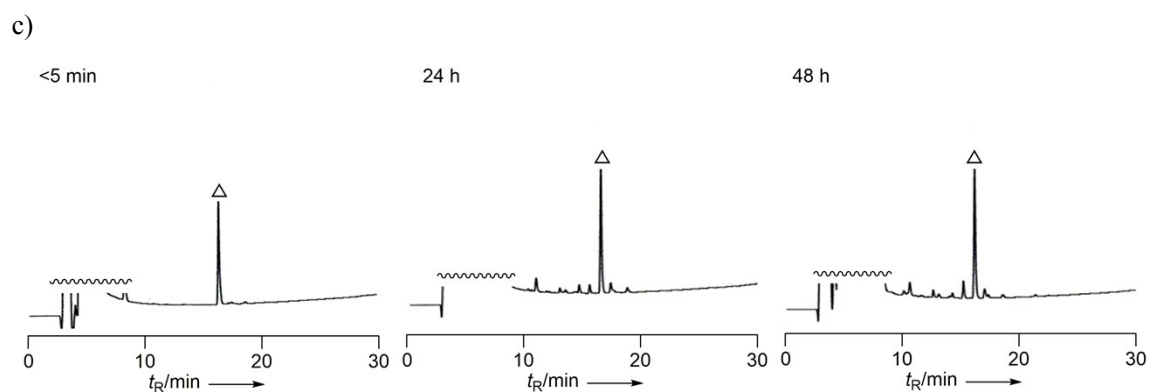

**S2.** (a) HPLC analysis of the SEAL **6** (○, 10 μM) with butylamine (1 M) in 50 mM HEPES buffer (pH 7.2) at 37 °C for 5 min > (left), 24 h (middle) or 48 h (right) of incubation. × denotes oxidated SEAL **6**. However, the aminolysis product **S1** and **S2** was not detected. (b) Chemical structures of **S1**, **S2**. (c) HPLC analysis of the SEAL **6** (△, 10 μM) with L-Cys methyl ester (1 mM) in 50 mM HEPES buffer (pH 7.2) at 37 °C for 5 min > (left), 24 h (middle) or 48 h (right) of incubation.

<sup>1</sup>H NMR spectrum of Fmoc-L-Lys(4-sulfamoyl-benzoyl)-OH

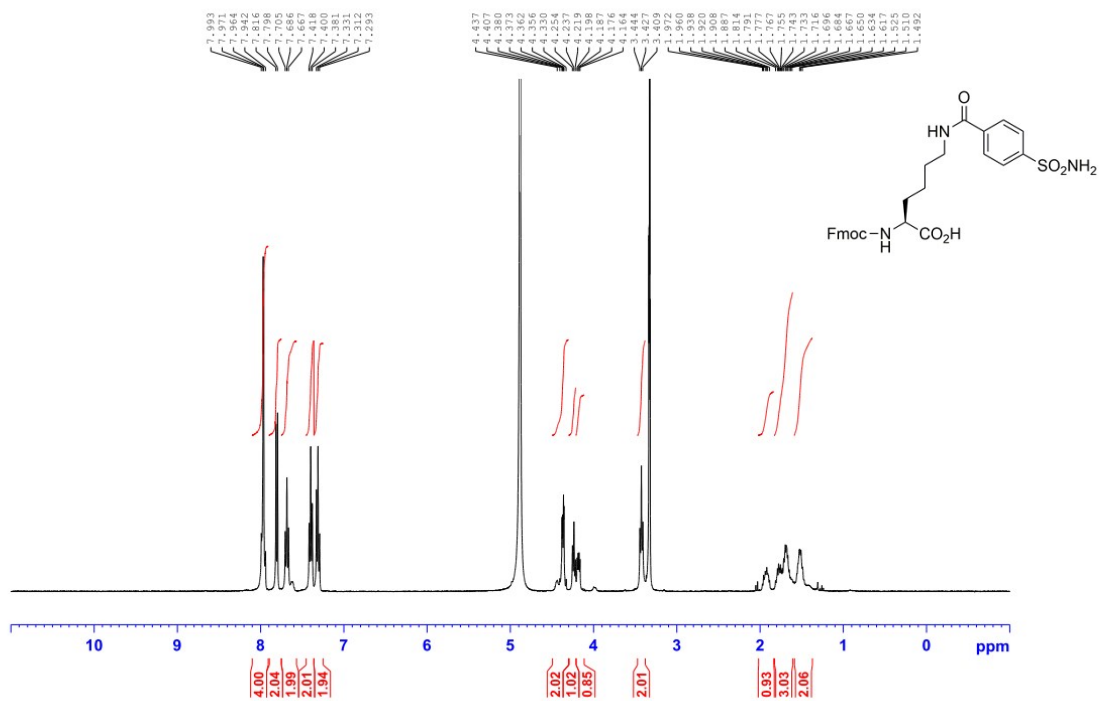

<sup>13</sup>C NMR spectrum of Fmoc-L-Lys(4-sulfamoyl-benzoyl)-OH

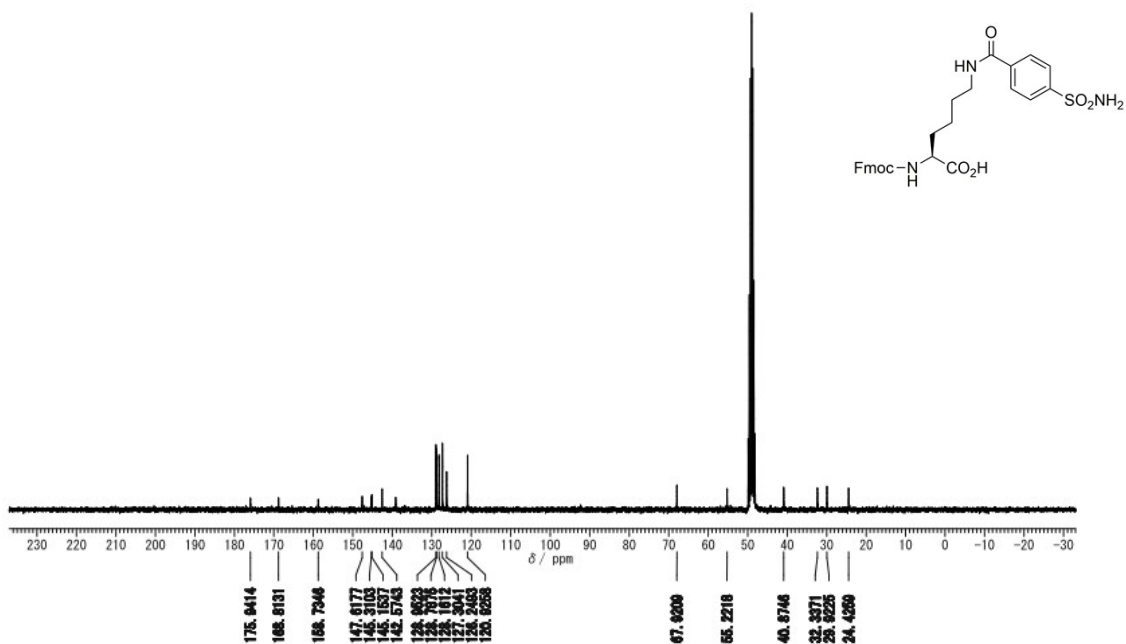

Supplement: c6ob01014h1.pdf [file c6ob01014h1.pdf]
